# Supplementary material for: Cs promoted Fe5C2/charcoal nanocatalysts for sustainable liquid fuel production
Source: Royal Society of Chemistry journal article supplement (doi:10.1039/c5ra03439f), 2015-01-01
Supplement: c5ra03439f1.pdf [file c5ra03439f1.pdf]

## Supporting Information

### Cs Promoted $\text{Fe}_5\text{C}_2$ /Charcoal Nanocatalysts for Sustainable Liquid Fuel Production

Ji Chan Park,\* Dong Hyun Chun, Jung-Il Yang, Ho-Tae Lee, Sungjun Hong, Geun Bae Rhim, Sanha Jang and Heon Jung\*

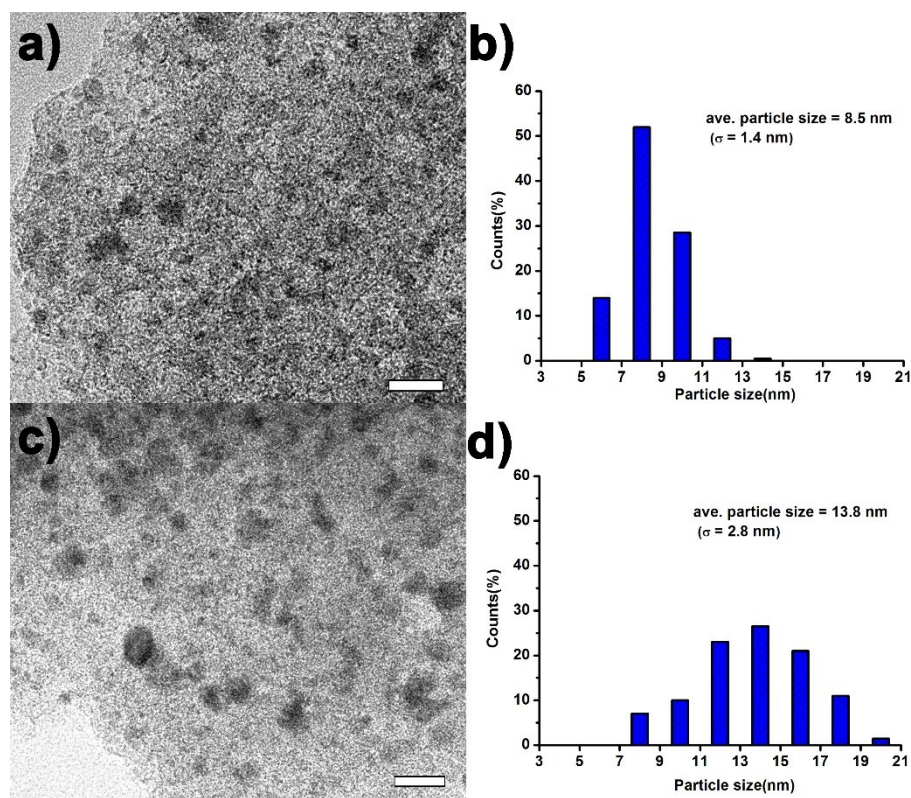

**Fig. S1** TEM images and particle size distribution histograms of Cs promoted  $\text{Fe}_5\text{C}_2$ /charcoal. (a,b) Cs/Fe = 0.025, (c,d) Cs/Fe = 0.050. More than 200 particles were counted for each sample. The bars (a,c) represent 20 nm.

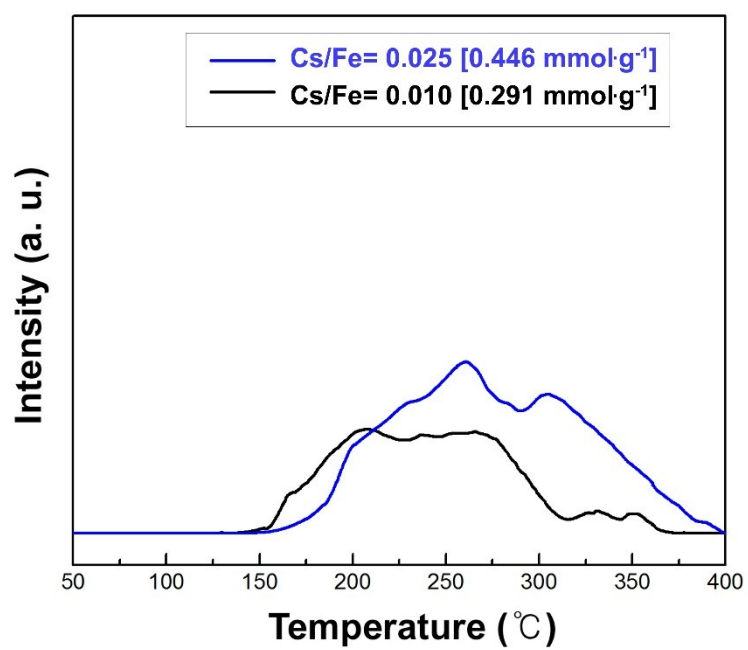

**Fig. S2** CO<sub>2</sub>-TPD profiles of Cs promoted catalysts and amount of CO<sub>2</sub> desorption measured by area under the peak.

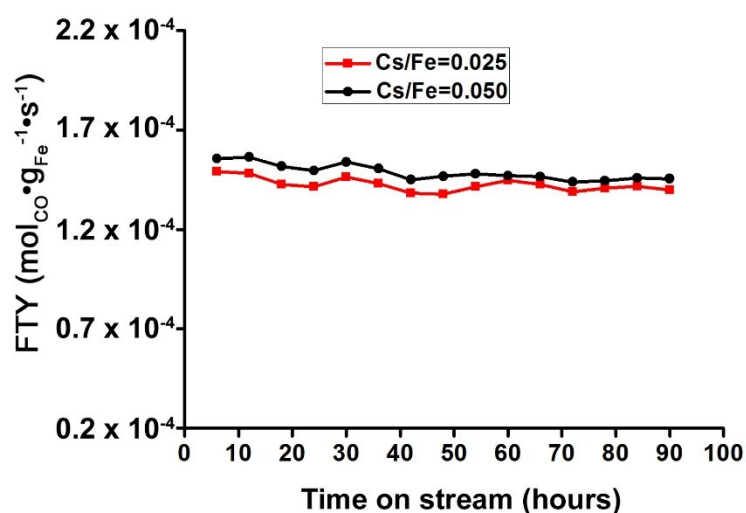

**Fig. S3** Catalytic performance of Cs promoted  $\text{Fe}_5\text{C}_2$ /charcoal catalysts for high-temperature FT synthesis.

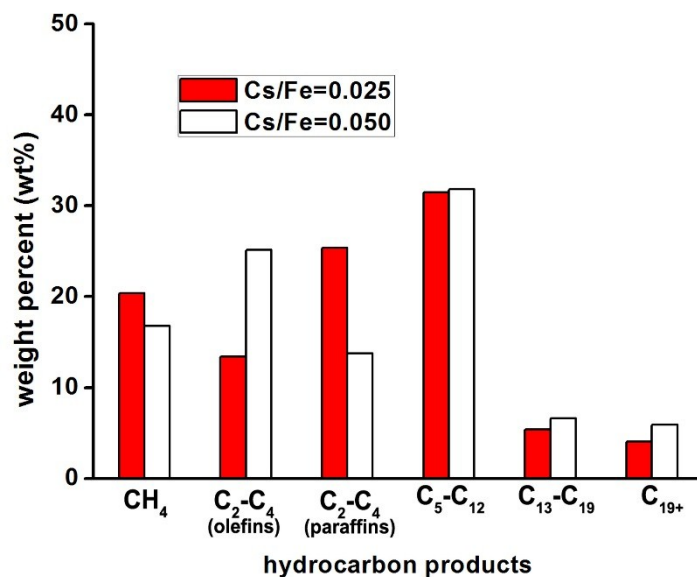

**Fig. S4** Hydrocarbon product distributions. The hydrocarbon distributions (wt%) for each sample were calculated from GC analysis of gas products ( $\text{C}_1\text{-C}_4$ ) and SIMDIS analysis of isolated liquid and solid products.

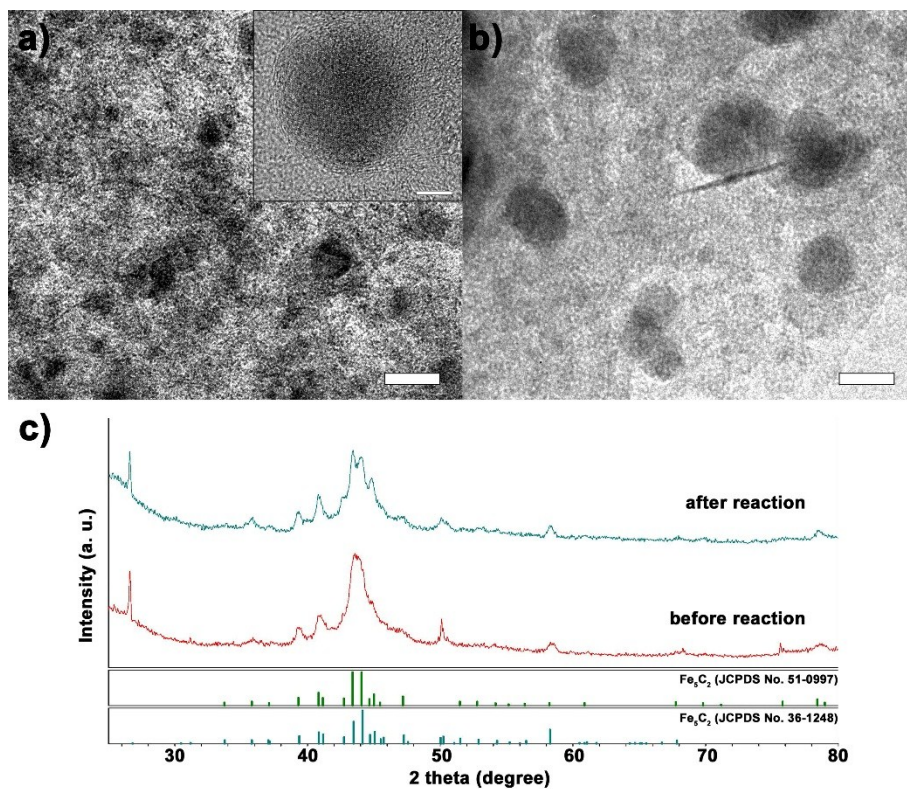

**Fig. S5** (a) TEM and HRTEM images (inset) of the recovered Cs promoted  $\text{Fe}_5\text{C}_2/\text{charcoal}$  catalyst (Cs/Fe=0.025) after the FT reaction, (b) TEM image and (c) XRD spectrum of the recovered Cs promoted  $\text{Fe}_5\text{C}_2/\text{charcoal}$  catalyst (Cs/Fe=0.050) after the FT reaction. The bars represent (a,b) 20 nm and (inset) 5 nm.

**Table S1** A comparison of the CO conversion and FT activity of Cs promoted Fe<sub>5</sub>C<sub>2</sub> catalysts with some literature Fe supported catalysts in high temperature FT reactions.

| Catalyst                                                               | Total CO conv. (%) | FTY (mol <sub>CO</sub> •g <sub>Fe</sub> <sup>-1</sup> •s <sup>-1</sup> ) | Ref.                   |
|------------------------------------------------------------------------|--------------------|--------------------------------------------------------------------------|------------------------|
| Cs/Fe <sub>5</sub> C <sub>2</sub> /charcoal<br>(Cs/Fe=0.025, Fe 20wt%) | 97                 | 1.40×10 <sup>-4</sup>                                                    | This work <sup>a</sup> |
| Cs/Fe <sub>5</sub> C <sub>2</sub> /charcoal<br>(Cs/Fe=0.050, Fe 20wt%) | 96                 | 1.45×10 <sup>-4</sup>                                                    | This work <sup>a</sup> |
| Cs/Fe <sub>5</sub> C <sub>2</sub> /charcoal<br>(Cs/Fe=0.100, Fe 20wt%) | 63                 | 9.0×10 <sup>-5</sup>                                                     | This work <sup>a</sup> |
| Fe/CNF (Fe 12wt%)                                                      | 88                 | 2.98×10 <sup>-5</sup>                                                    |                        |
| Fe-Cu-K-SiO <sub>2</sub> (Fe 32wt%)                                    | 79                 | 1.12×10 <sup>-5</sup>                                                    | 1) <sup>b</sup>        |
| Fe/α-Al <sub>2</sub> O <sub>3</sub> (6wt% Fe)                          | 77                 | 8.48×10 <sup>-5</sup>                                                    |                        |
| Fe-Ru-K/CNT (9.8wt% Fe)                                                | 25                 | 1.1×10 <sup>-4</sup>                                                     | 2) <sup>c</sup>        |

Catalytic tests were carried out at <sup>a</sup>T = 320°C, P = 15 bar, H<sub>2</sub>/CO ratio=1, <sup>b</sup>T = 340°C, P = 20 bar, H<sub>2</sub>/CO ratio = 1, and <sup>c</sup>T = 275°C, P = 8 bar, H<sub>2</sub>/CO ratio= 2, respectively.

**Table S2** Liquid and solid hydrocarbon productivity of Cs promoted Fe<sub>5</sub>C<sub>2</sub> on charcoal catalysts.

| Data                                                                                         | Catalyst    |             |
|----------------------------------------------------------------------------------------------|-------------|-------------|
|                                                                                              | Cs/Fe=0.025 | Cs/Fe=0.050 |
| liquid oil productivity (g <sub>liq</sub> •g <sub>cat</sub> <sup>-1</sup> •h <sup>-1</sup> ) | 0.401       | 0.296       |
| solid wax productivity (g <sub>sol</sub> •g <sub>cat</sub> <sup>-1</sup> •h <sup>-1</sup> )  | 0.026       | 0.164       |

The g<sub>cat</sub> is the weight sum of Fe and the charcoal support. The values of g<sub>liq</sub> and g<sub>sol</sub> indicate the weights of the isolated liquid oil and solid wax after reaction, respectively.

**Table S3** Gas product yields of Cs promoted Fe<sub>5</sub>C<sub>2</sub> on charcoal catalysts after 90 h on stream.

| Catalyst      | Gas product yield (10 <sup>-4</sup> g <sub>HC</sub> •g <sub>Fe</sub> <sup>-1</sup> •s <sup>-1</sup> ) |                                        |                                          |       |
|---------------|-------------------------------------------------------------------------------------------------------|----------------------------------------|------------------------------------------|-------|
|               | CH <sub>4</sub>                                                                                       | C <sub>2</sub> -C <sub>4</sub> olefins | C <sub>2</sub> -C <sub>4</sub> paraffins | Total |
| Cs/Fe = 0.025 | 2.95                                                                                                  | 1.94                                   | 3.67                                     | 8.56  |
| Cs/Fe = 0.050 | 2.42                                                                                                  | 3.62                                   | 1.99                                     | 8.03  |

#### References)

- 1) H. M. T. Galvis, J. H. Bitter, C. B. Khare, M. Ruitenbeek, A. I. Dugulan and K. P. de Jong, *Science*, 2012, **335**, 835.
- 2) M. C. Bahome, L. L. Jewell, K. Padayachy, D. Hildebrandt, D. Glasser, A. K. Datye and N. J. Coville, *Appl. Catal. A: Gen.*, 2007, **328**, 243.
